# Supplementary material
Source: PubMed Central journal article supplement (PMC3734581)
Supplement: supp_M113.029686_mcp.M113.029686-1.pdf [file supp_M113.029686_mcp.M113.029686-1.pdf]

**Table S3: Single-peptide-based protein identification**

Table reporting the identification parameters of proteins identified with one single peptide, according to the Molecular and Cellular Proteomics guidelines.

The first two columns display protein accession and gene name retrieved from the UniProtKB-SwissProt database. The next columns give the mass/charge ratio of the selected precursor (m/z), the difference between the detected and the theoretic precursor m/z (error [Da]), the selected precursor charge (z) and the peptide sequence. The last three columns report the score (Hyperscore and Nextscore) and the expect values as calculated by the PeptideProphet algorithm (TPP, ISB, Seattle, USA).

For protein name, MW, probability, % of coverage and number of spectra, refer to Table S2.

| Acc. Nb. | Gene Name | m/z      | Error [Da] | z | Peptide                   | Hyperscore | Nextscore | Expect |
|----------|-----------|----------|------------|---|---------------------------|------------|-----------|--------|
| Q9D6J6   | Ndufv2    | 608.819  | 0          | 2 | DIEEIIDELK                | 551        | 502       | 2.7    |
| Q8BK64   | Ahsa1     | 805.7483 | -0.0013    | 3 | VFTTQELVQAFTHAPAALEADR    | 571        | 461       | 0.16   |
| Q9D5T0   | Atad1     | 953.5197 | -0.0035    | 2 | LQPSIIFIDEIDSFLR          | 487        | 395       | 0.81   |
| Q9CQQ7   | Atp5f1    | 614.3343 | -0.0045    | 3 | LGLIPEEFFQLYPK            | 638        | 479       | 0.094  |
| P00920   | Ca2       | 834.9878 | -0.0088    | 2 | AVQQPDGLAVLGIFLK          | 487        | 410       | 0.11   |
| P60766   | Cdc42     | 618.3279 | -0.0039    | 3 | NVFDEAILAALEPPEPK         | 573        | 468       | 0.32   |
| Q6NVF9   | Cpsf6     | 818.0988 | -0.003     | 3 | AVSDASAGDYGSAIETLVTAISLIK | 639        | 506       | 0.043  |
| Q99LI7   | Cstf3     | 869.4747 | -0.0055    | 2 | FLAFESNIGDLASILK          | 486        | 357       | 0.11   |
| O35343   | Kpna4     | 604.3473 | -0.0064    | 3 | DAQVVQVVDGLSNILK          | 666        | 538       | 0.29   |
| Q08288   | Lyar      | 815.4334 | 0.0015     | 2 | ELLQQISAFDNVPR            | 513        | 390       | 0.063  |
| Q9DBD5   | Pelp1     | 776.4771 | 0.0012     | 2 | LLLLESISGLLQPR            | 419        | 348       | 0.28   |
| O08709   | Prdx6     | 763.9286 | -0.0034    | 2 | DLAILLGMLDPVEK            | 515        | 425       | 0.66   |
| P46061   | Rangap1   | 630.847  | 0.0003     | 2 | TAVLDAIDALMK              | 462        | 373       | 1.3    |
| P32067   | Ssb       | 735.3854 | -0.0019    | 2 | GSIFAVFDSIQSAK            | 487        | 374       | 0.07   |
| P63028   | Tpt1      | 565.6139 | -0.0027    | 3 | DLISHDELFSDIYK            | 536        | 417       | 0.21   |
| P62960   | Ybx1      | 898.4153 | -0.0047    | 2 | SVGDGETVEFDVVEGEK         | 573        | 385       | 0.0018 |

### Figure S1: Spectra of single-peptide-based protein identification

MS/MS spectra for each peptide listed in Table S3 are reported. Captions originated from the Lorikeet spectrum viewer integrated within the Trans Proteomic Pipeline v.4.6.2 (ISB, Seattle, USA). Spectra are labeled with the detected masses and a Table of the theoretical fragment assignments is provided on the right side.

#### Q9D6J6\_Ndufv2\_NADH dehydrogenase [ubiquinone] flavoprotein 2, isoform 2

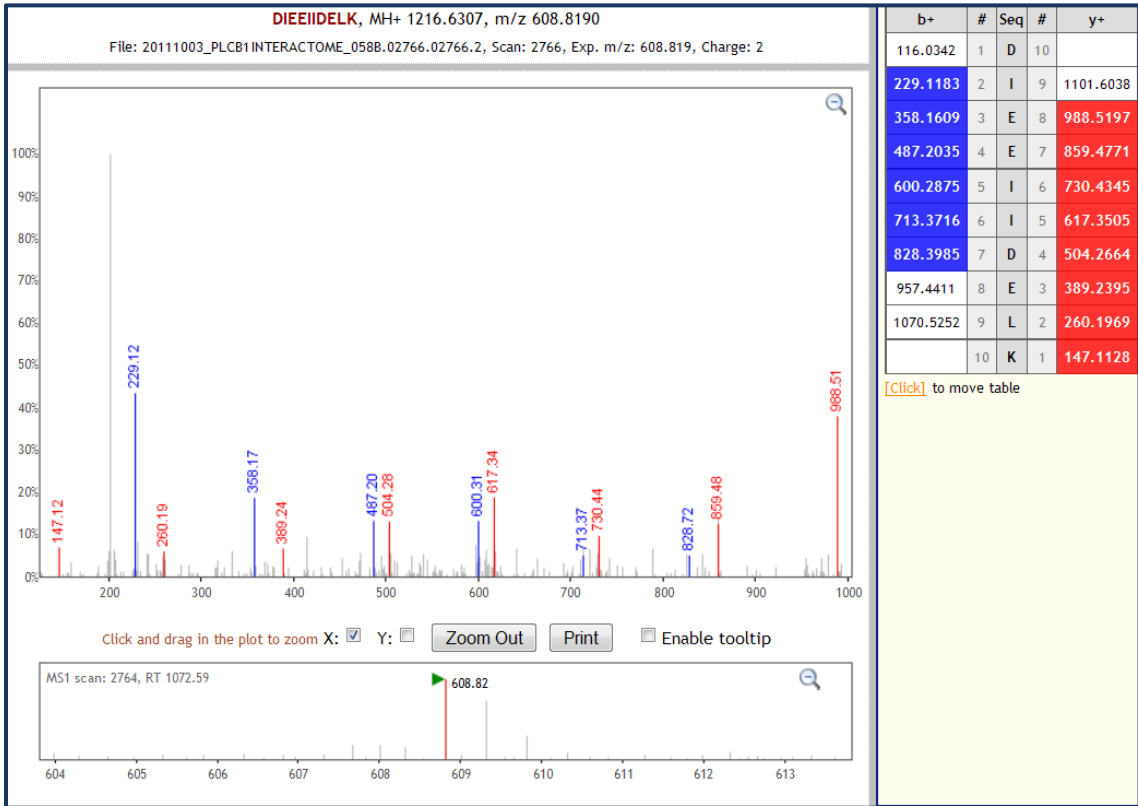

#### Q8BK64\_Ahsa1\_Activator of 90 kDa heat shock protein ATPase homolog 1

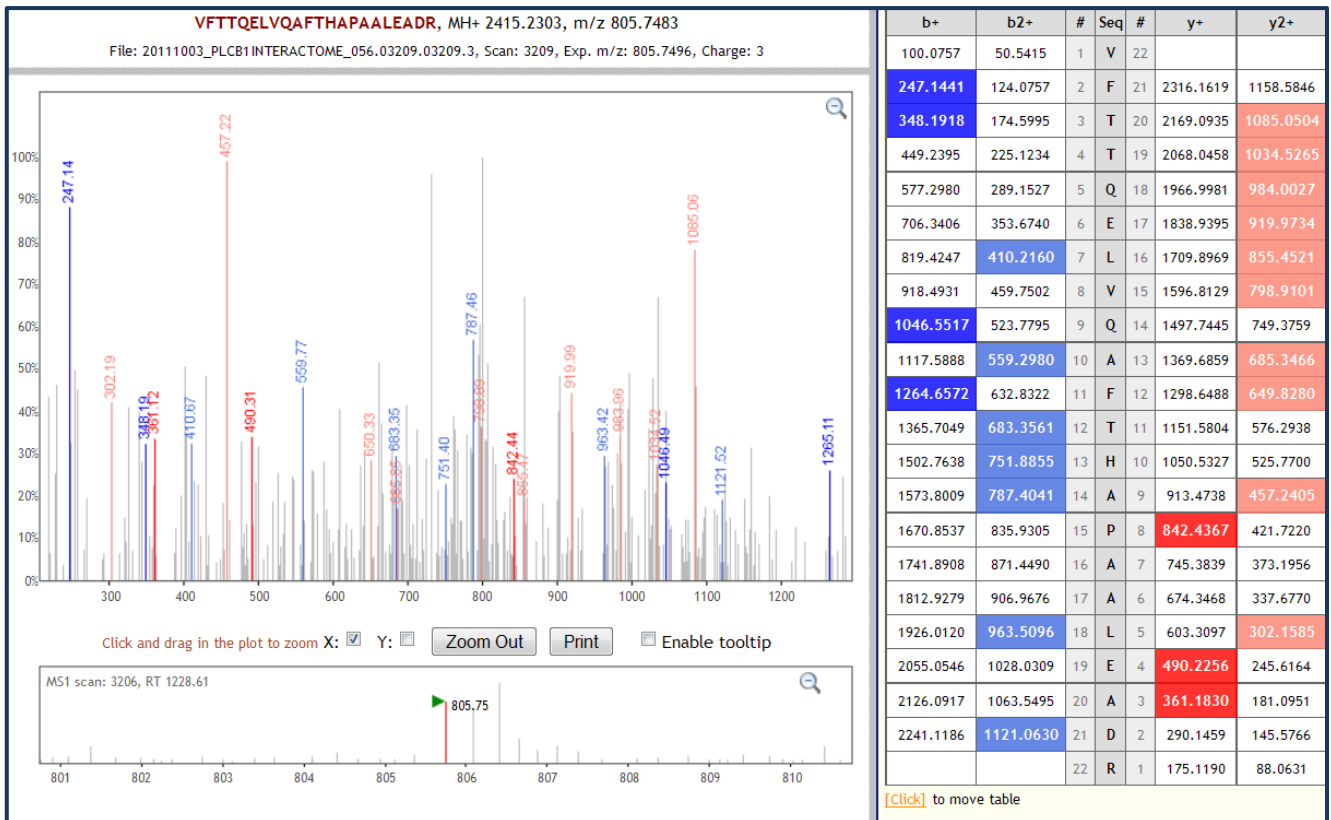

## Q9D5T0\_Atad1\_ATPase family AAA domain-containing protein 1

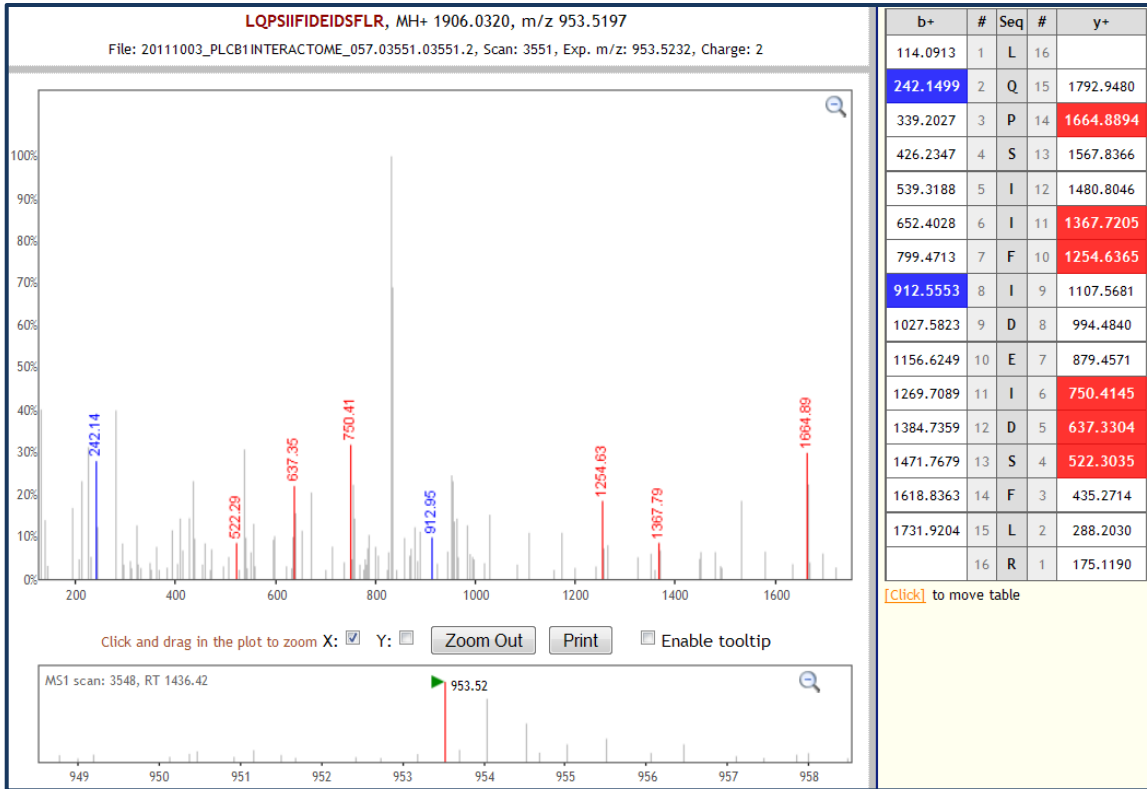

## Q9CQQ7\_Atp5f1\_ATP synthase subunit b

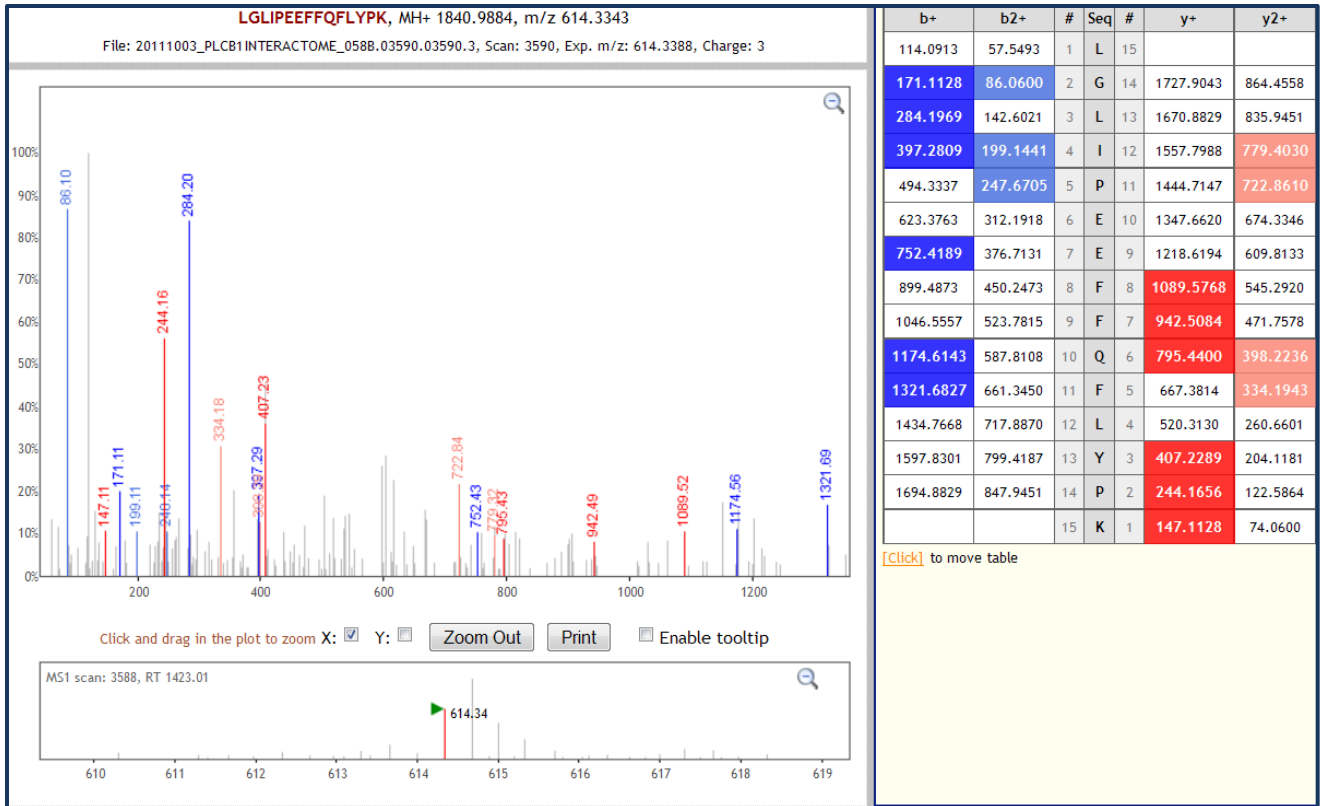

## P00920\_Ca2\_Carbonic anhydrase 2

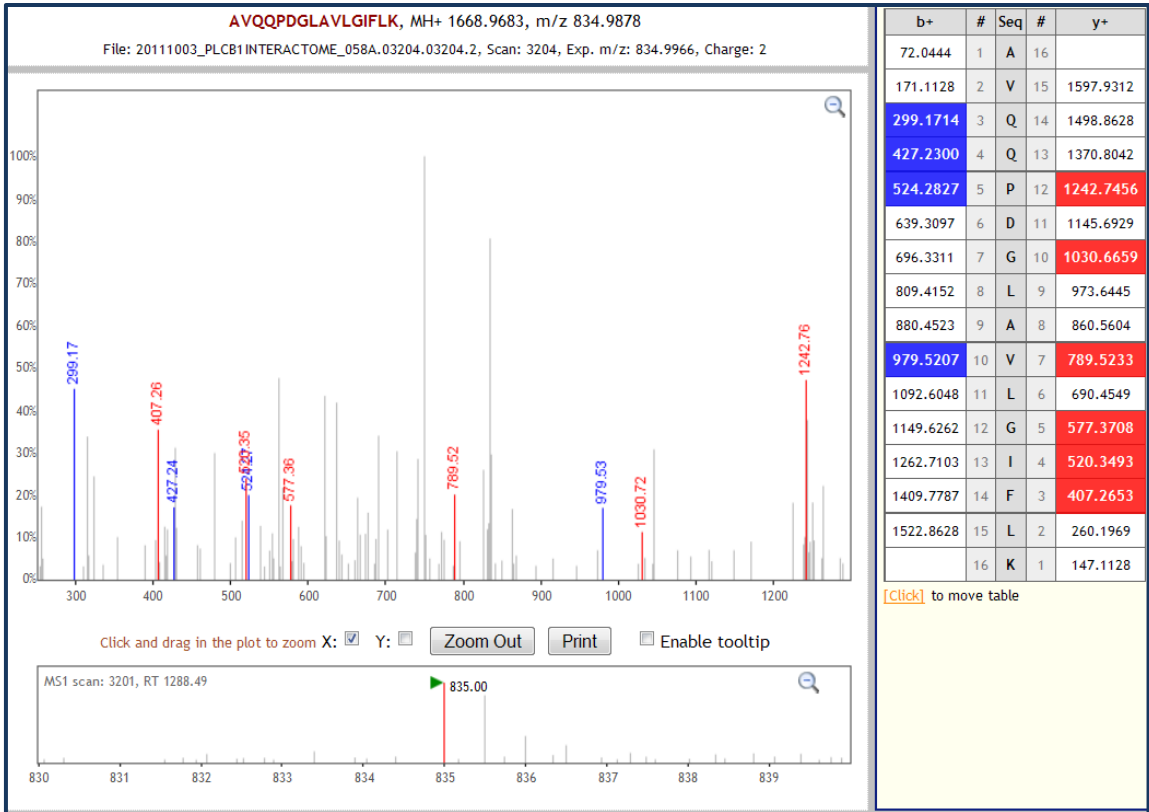

## P60766\_Cdc42\_Cell division control protein 42 homolog

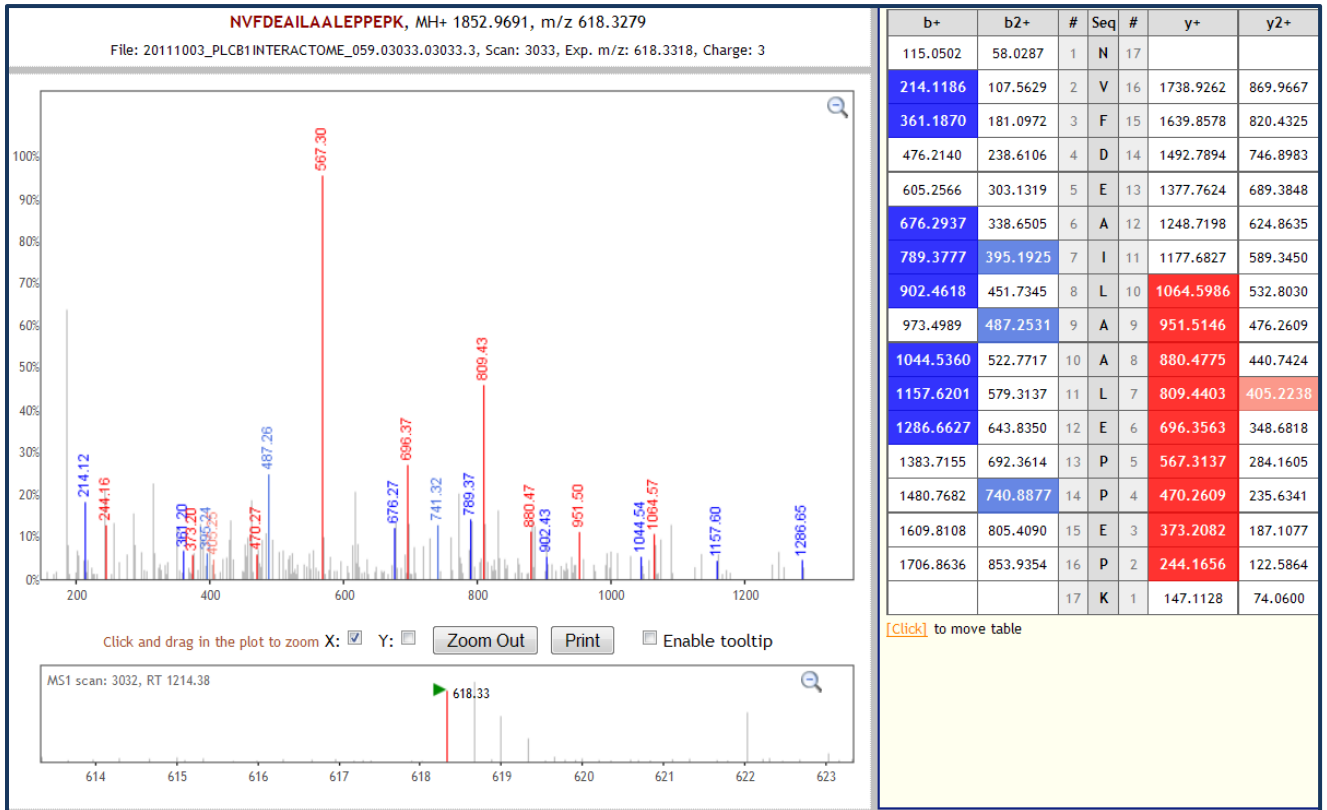

## Q6NVF9\_Cpsf6\_Cleavage and polyadenylation specificity factor subunit 6

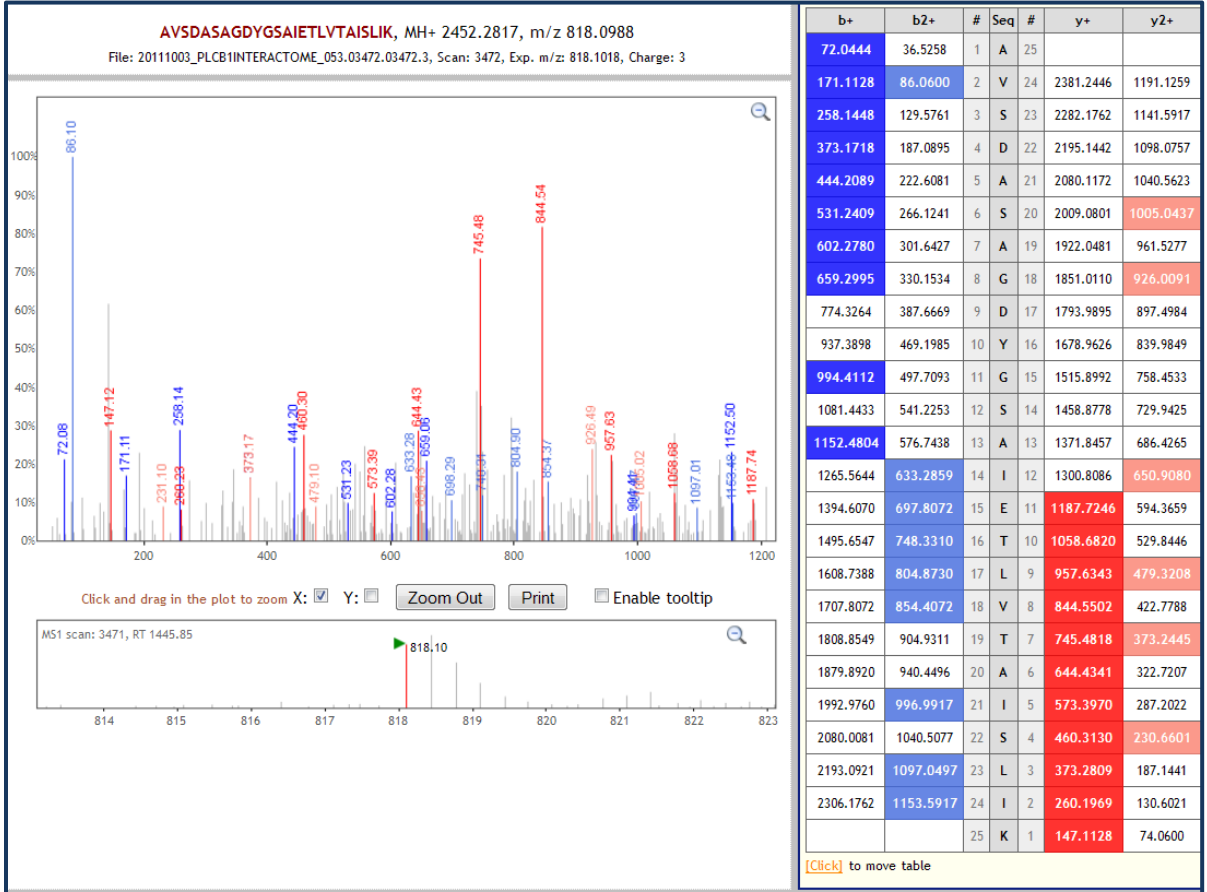

## Q99LI7\_Cstf3\_Cleavage stimulation factor subunit 3

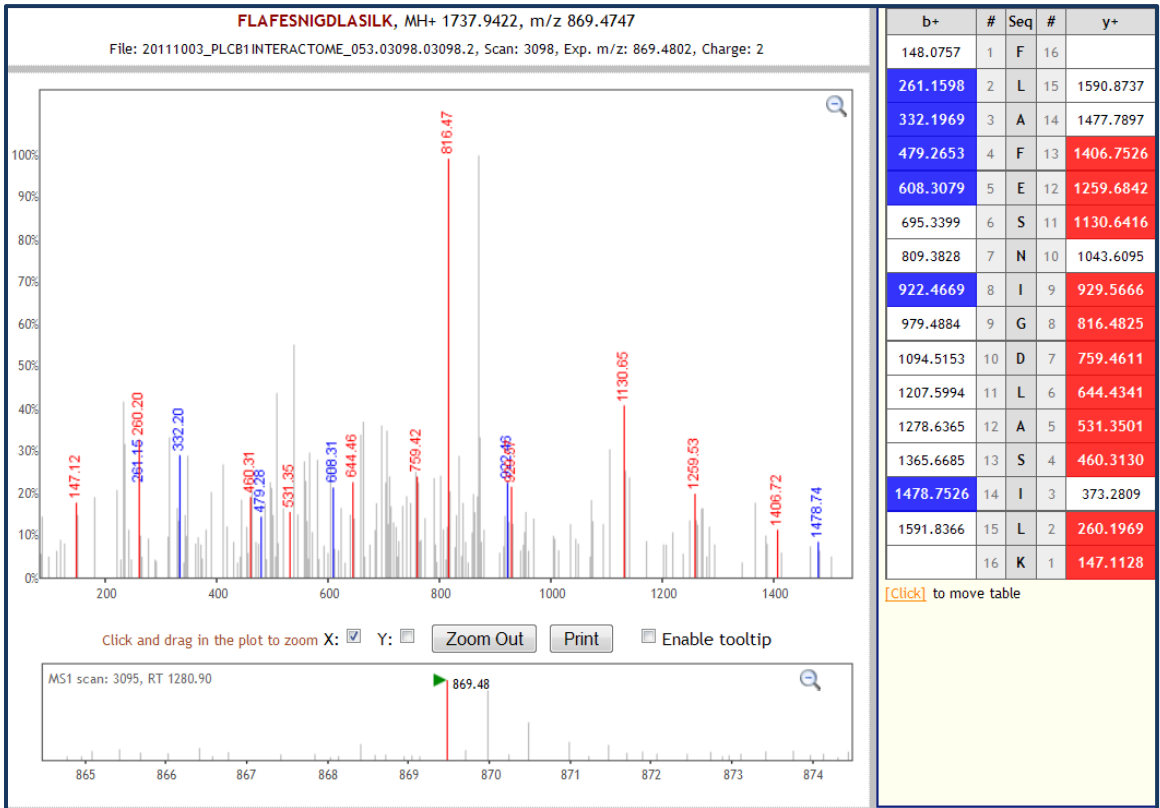

### Q05343\_Kpna4\_Importin subunit alpha-4

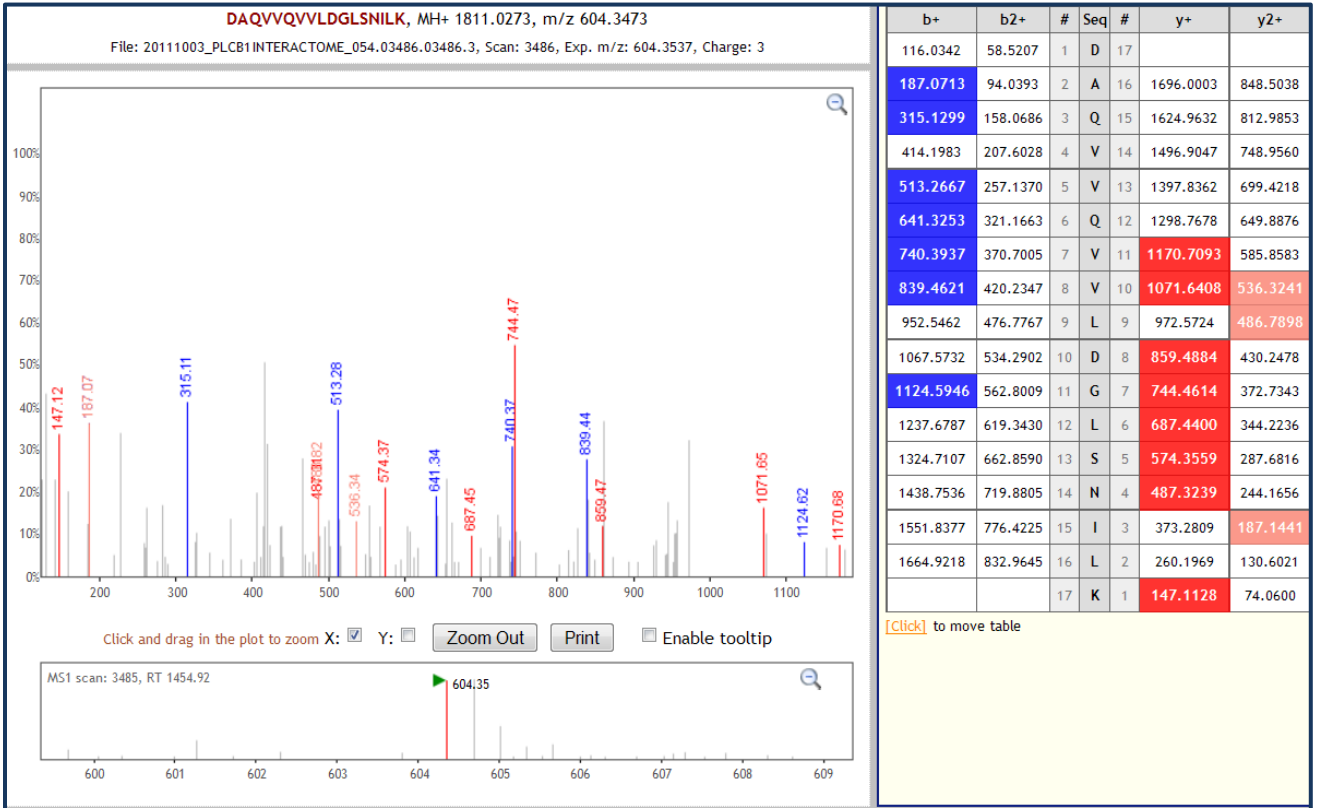

### Q08288\_Lyar\_Cell growth-regulating nucleolar protein

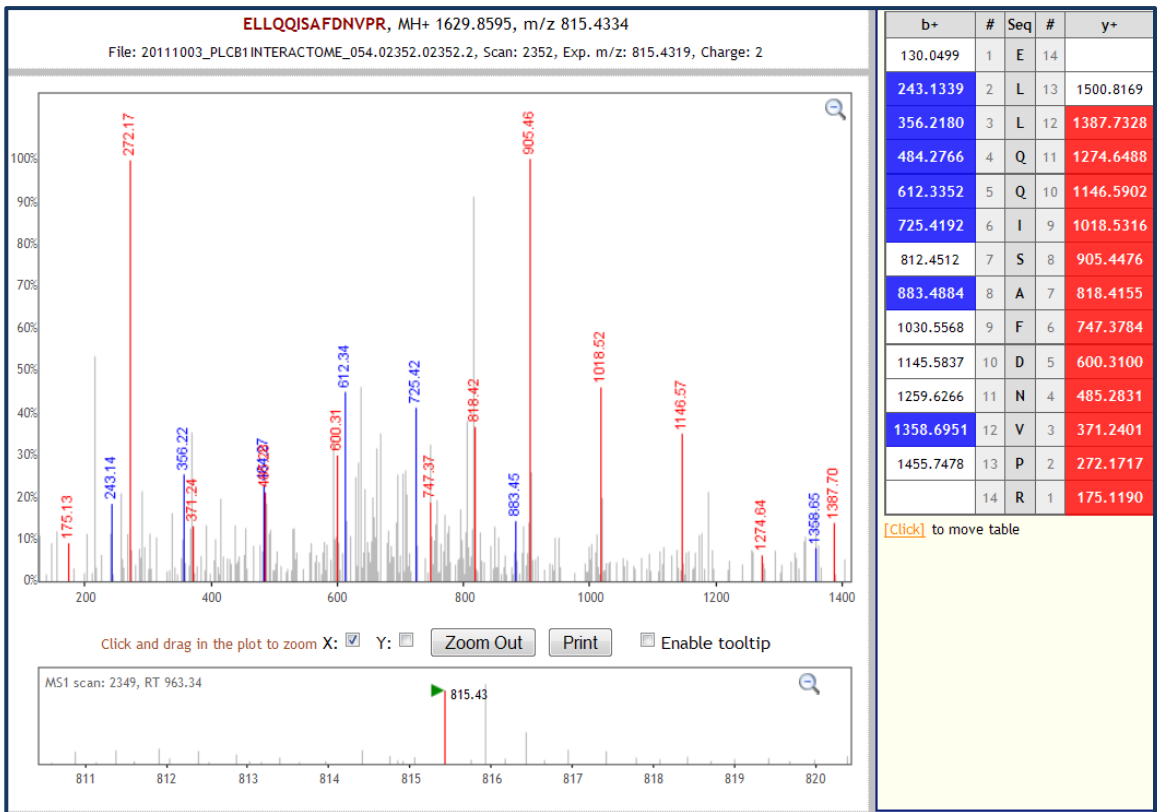

## Q9DBD5\_Pelp1\_Proline-, glutamic acid- and leucine-rich protein 1

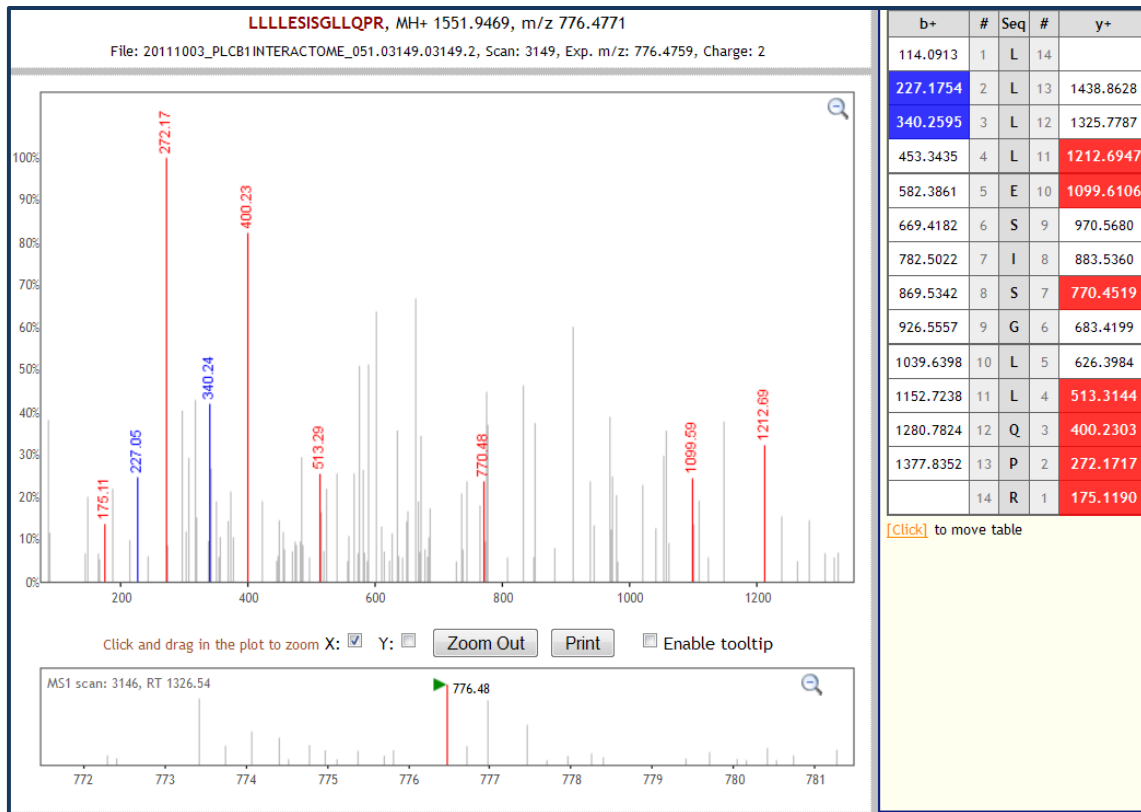

## O08709\_Prdx6\_Peroxiredoxin-6

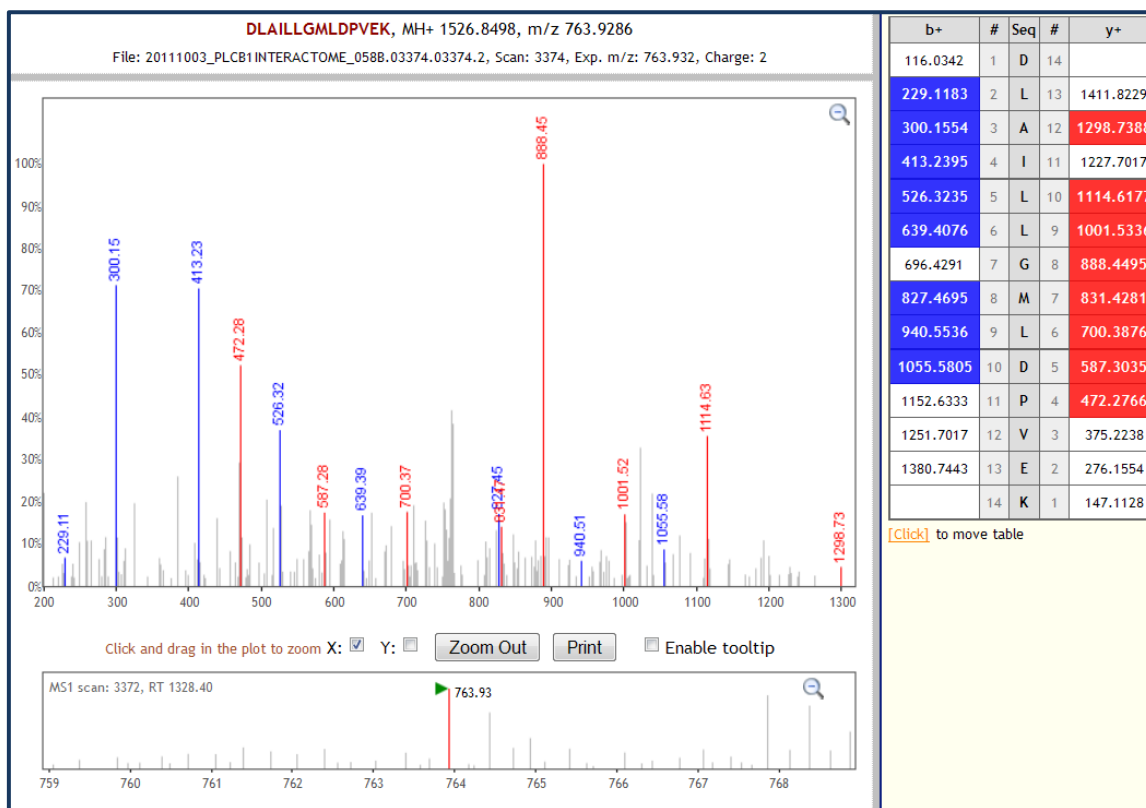

## P46061\_Rangap1\_RanGTPase-activating protein 1

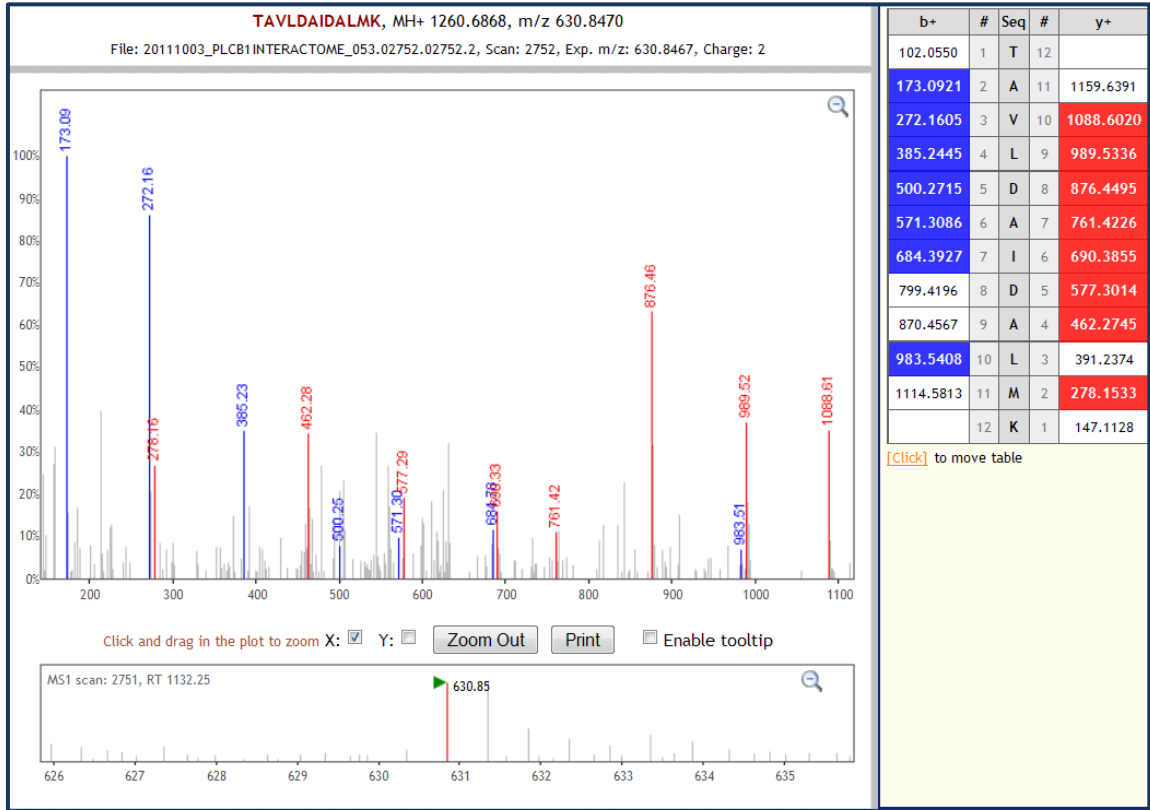

## P32067\_Ssb\_Lupus La protein homolog

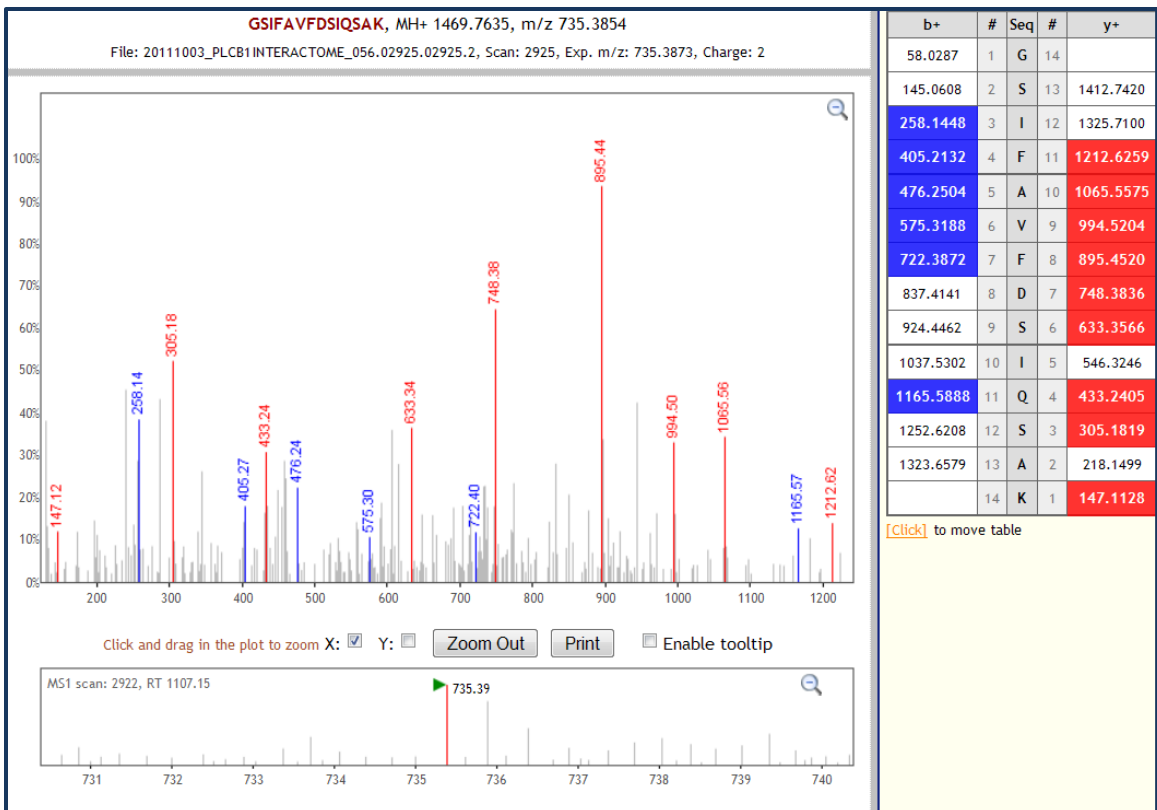



## P63028\_Tpt1\_Translationally-controlled tumor protein

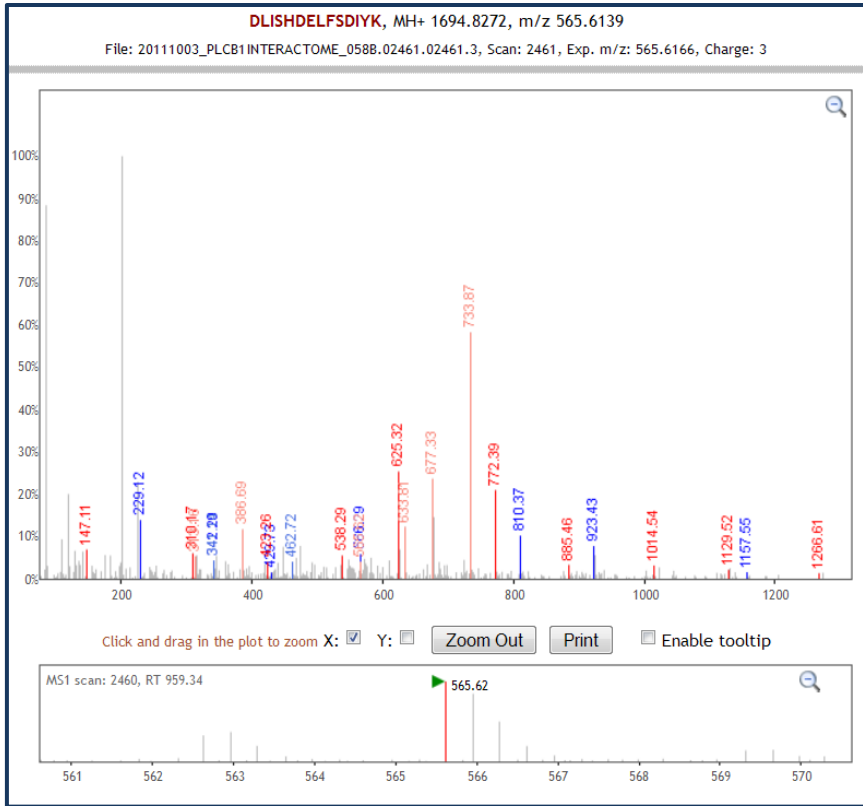

| b+        | b2+      | #  | Seq # | y+        | y2+      |
|-----------|----------|----|-------|-----------|----------|
| 116.0342  | 58.5207  | 1  | D 14  |           |          |
| 229.1183  | 115.0628 | 2  | L 13  | 1579.8003 | 790.4038 |
| 342.2023  | 171.6048 | 3  | I 12  | 1466.7162 | 733.8617 |
| 429.2344  | 215.1208 | 4  | S 11  | 1353.6321 | 677.3197 |
| 566.2933  | 283.6503 | 5  | H 10  | 1266.6001 | 633.8037 |
| 681.3202  | 341.1638 | 6  | D 9   | 1129.5412 | 565.2742 |
| 810.3628  | 405.6850 | 7  | E 8   | 1014.5142 | 507.7608 |
| 923.4469  | 462.2271 | 8  | L 7   | 885.4716  | 443.2395 |
| 1070.5153 | 535.7613 | 9  | F 6   | 772.3876  | 386.6974 |
| 1157.5473 | 579.2773 | 10 | S 5   | 625.3192  | 313.1632 |
| 1272.5743 | 636.7908 | 11 | D 4   | 538.2871  | 269.6472 |
| 1385.6583 | 693.3328 | 12 | I 3   | 423.2602  | 212.1337 |
| 1548.7217 | 774.8645 | 13 | Y 2   | 310.1761  | 155.5917 |
|           |          | 14 | K 1   | 147.1128  | 74.0600  |

[\[click\]](#) to move table

## P62960\_Ybx1\_Nuclease-sensitive element-binding protein 1

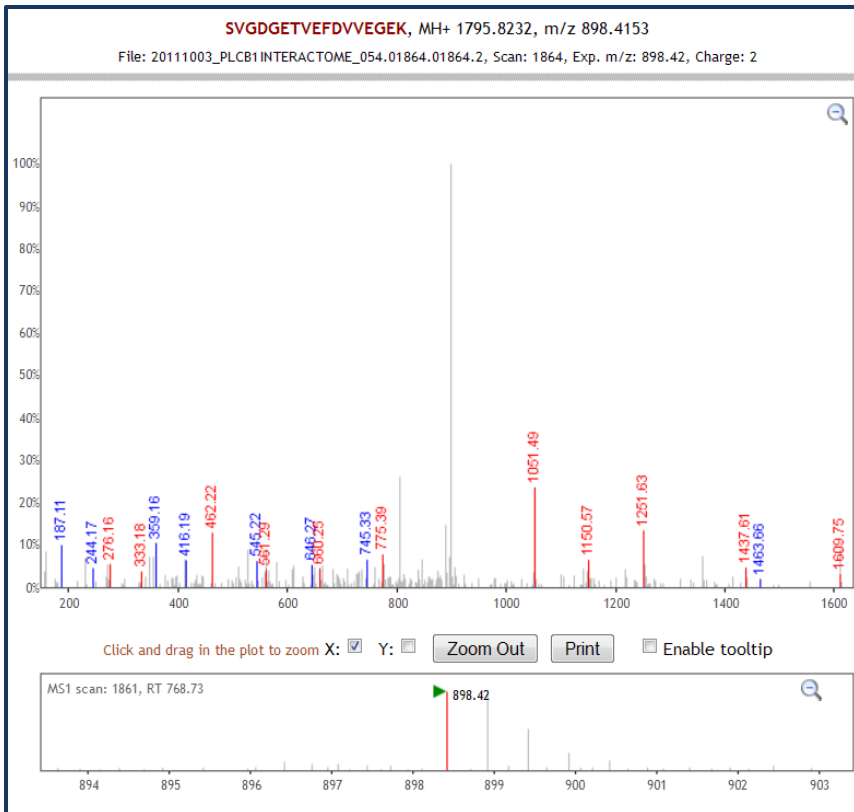

| b+        | #  | Seq # | y+        |
|-----------|----|-------|-----------|
| 88.0393   | 1  | S 17  |           |
| 187.1077  | 2  | V 16  | 1708.7912 |
| 244.1292  | 3  | G 15  | 1609.7228 |
| 359.1561  | 4  | D 14  | 1552.7013 |
| 416.1776  | 5  | G 13  | 1437.6744 |
| 545.2202  | 6  | E 12  | 1380.6529 |
| 646.2679  | 7  | T 11  | 1251.6103 |
| 745.3363  | 8  | V 10  | 1150.5626 |
| 874.3789  | 9  | E 9   | 1051.4942 |
| 1021.4473 | 10 | F 8   | 922.4516  |
| 1136.4742 | 11 | D 7   | 775.3832  |
| 1235.5426 | 12 | V 6   | 660.3563  |
| 1334.6111 | 13 | V 5   | 561.2879  |
| 1463.6536 | 14 | E 4   | 462.2195  |
| 1520.6751 | 15 | G 3   | 333.1769  |
| 1649.7177 | 16 | E 2   | 276.1554  |
|           | 17 | K 1   | 147.1128  |

[\[click\]](#) to move table
